# Supplementary material for: Revealing the promotion of carbonyl groups on vacancy stabilized Pt4/nanocarbons for propane dehydrogenation
Source: Royal Society of Chemistry journal article supplement (doi:10.1039/d2cp03263e), 2022-01-01
Supplement: d2cp03263e1.pdf [file d2cp03263e1.pdf]

## Supporting Information

### Revealing the Promotion of Carbonyl groups on Vacancy Stabilized Pt<sub>4</sub>/nanocarbons for Propane Dehydrogenation

Ziwei Zhai, Bofeng Zhang, Yutong Wang, Li Wang, Sibao Liu and Guozhu Liu\*

Key Laboratory for Green Chemical Technology of Ministry of Education, School of Chemical Engineering and Technology, Tianjin University, Tianjin 300072, China;

\* Corresponding author: Prof. Guozhu Liu

Telephone/Fax: +86-022-85356099

E-mail: [gliu@tju.edu.cn](mailto:gliu@tju.edu.cn)

#### **Definition of the binding energies of Pt clusters anchored on carbon nanoribbons with vacancies and OCGs**

The binding energies of Pt clusters were calculated by the following equation:

$$E_b = E_{Pt/Support} - E_{Pt} - E_{Support} \quad (S1)$$

Where  $E_{Pt/Support}$  was the total energy of the Pt clusters anchored on the carbon nanoribbons with various vacancies and OCGs;  $E_{Pt}$  was the energy of Pt clusters in vacuum;  $E_{Support}$  was the total energy of the carbon nanoribbons.

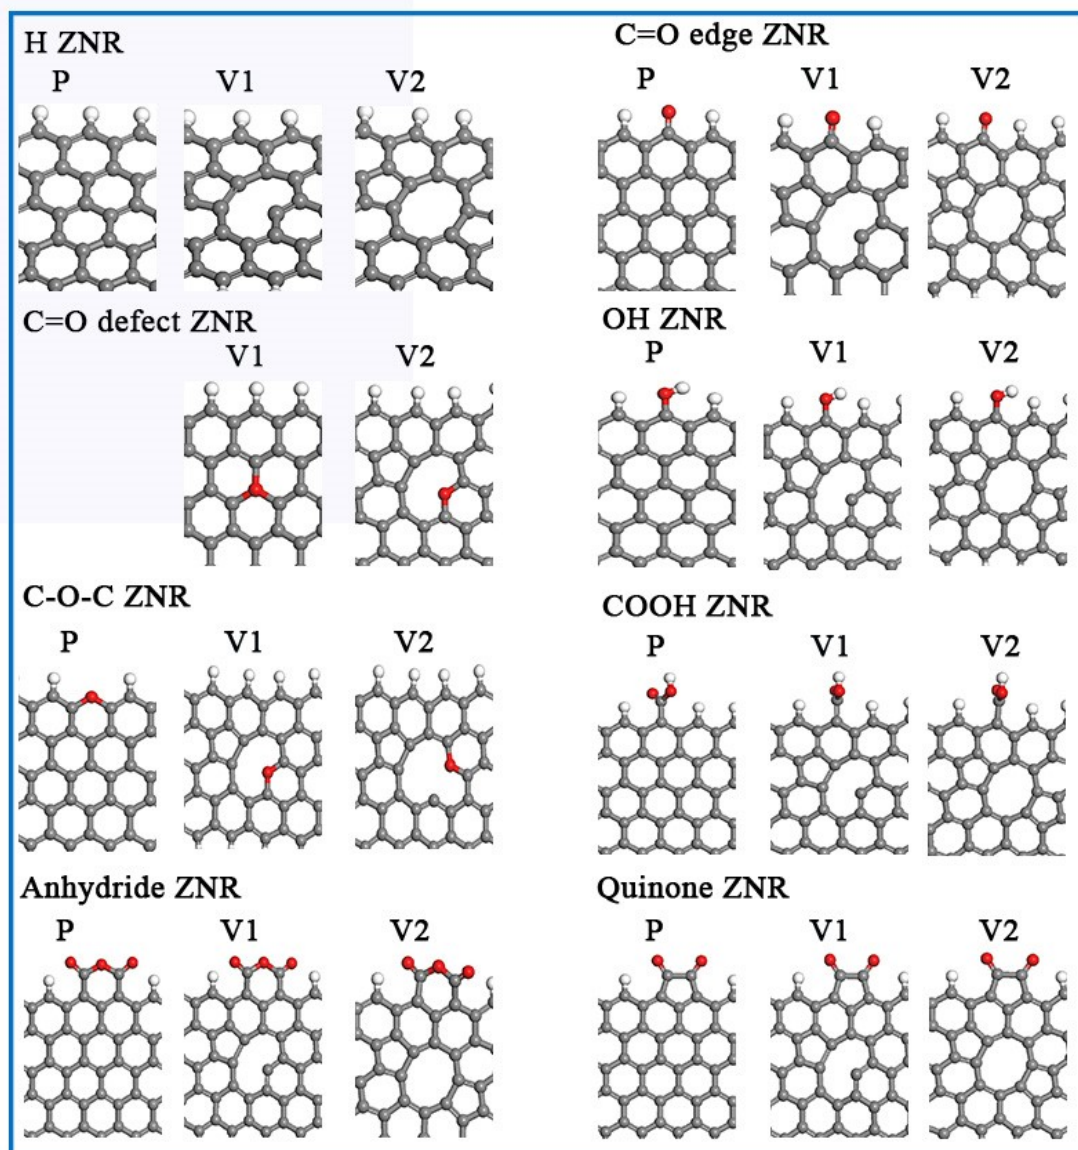

**Fig. S1.** The geometric configurations of different vacancies and OCGs in the carbon nanoribbons with zigzag edges.

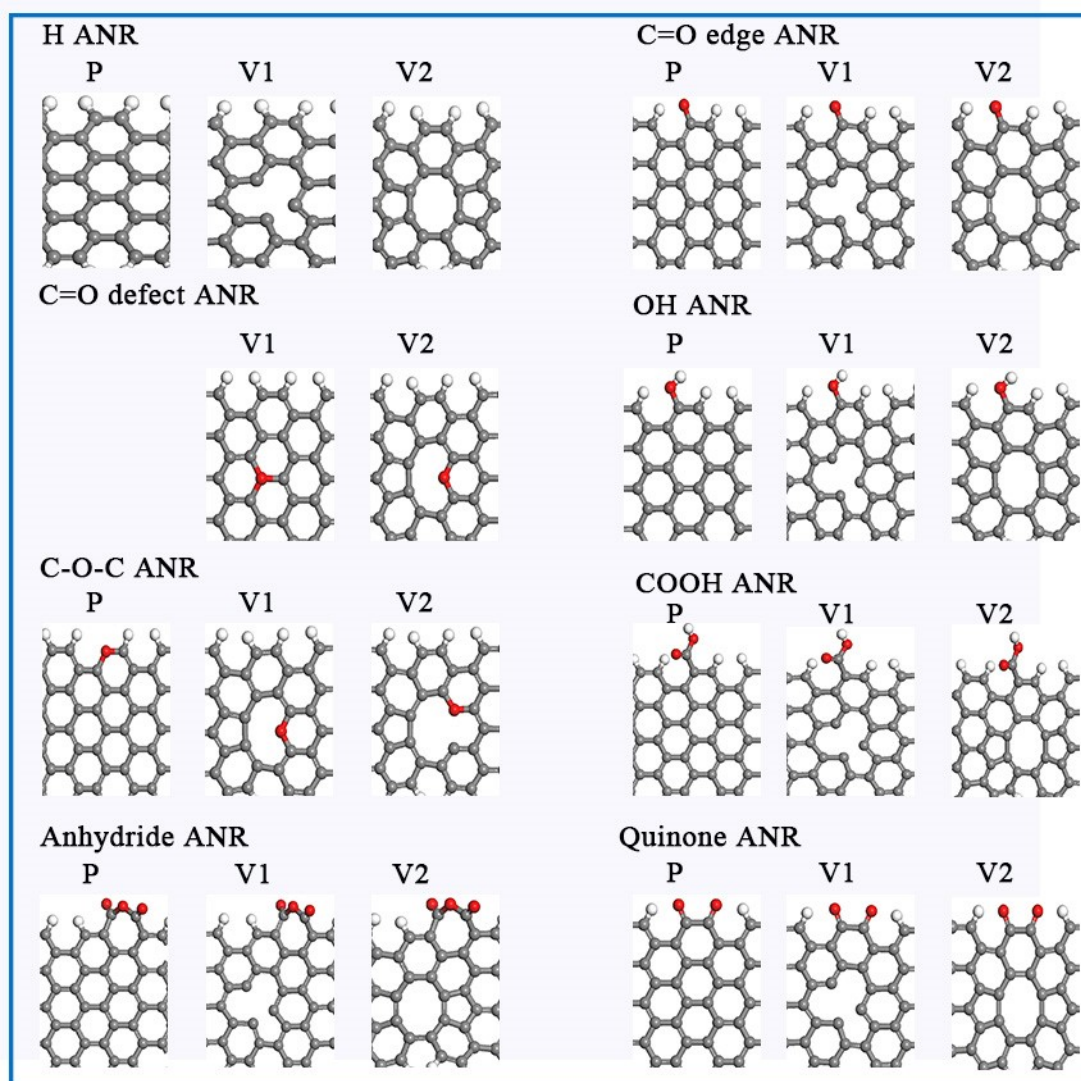

**Fig. S2.** The geometric configurations of different vacancies and OCGs in the carbon nanoribbons with armchair edges.

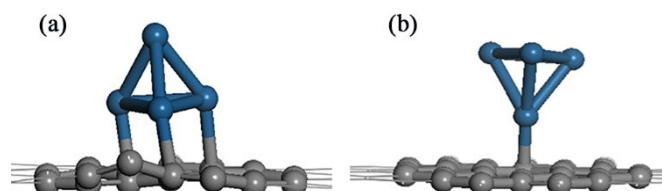

**Fig. S3.** The anchored models of (a) top tetrahedral (b) bottom tetrahedral of Pt clusters anchored on carbon nanoribbon.

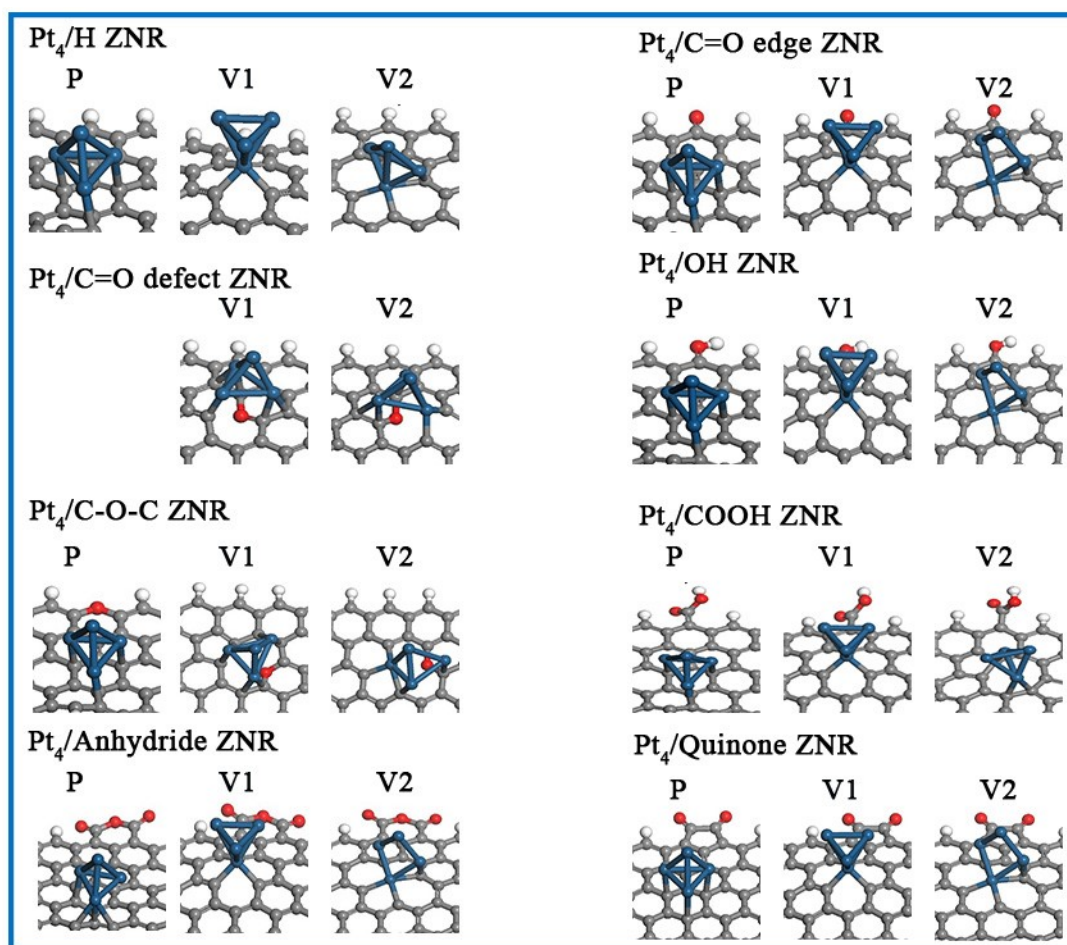

Fig. S4. The optimized configurations of Pt<sub>4</sub> anchored on the carbon nanoribbons with zigzag edges.

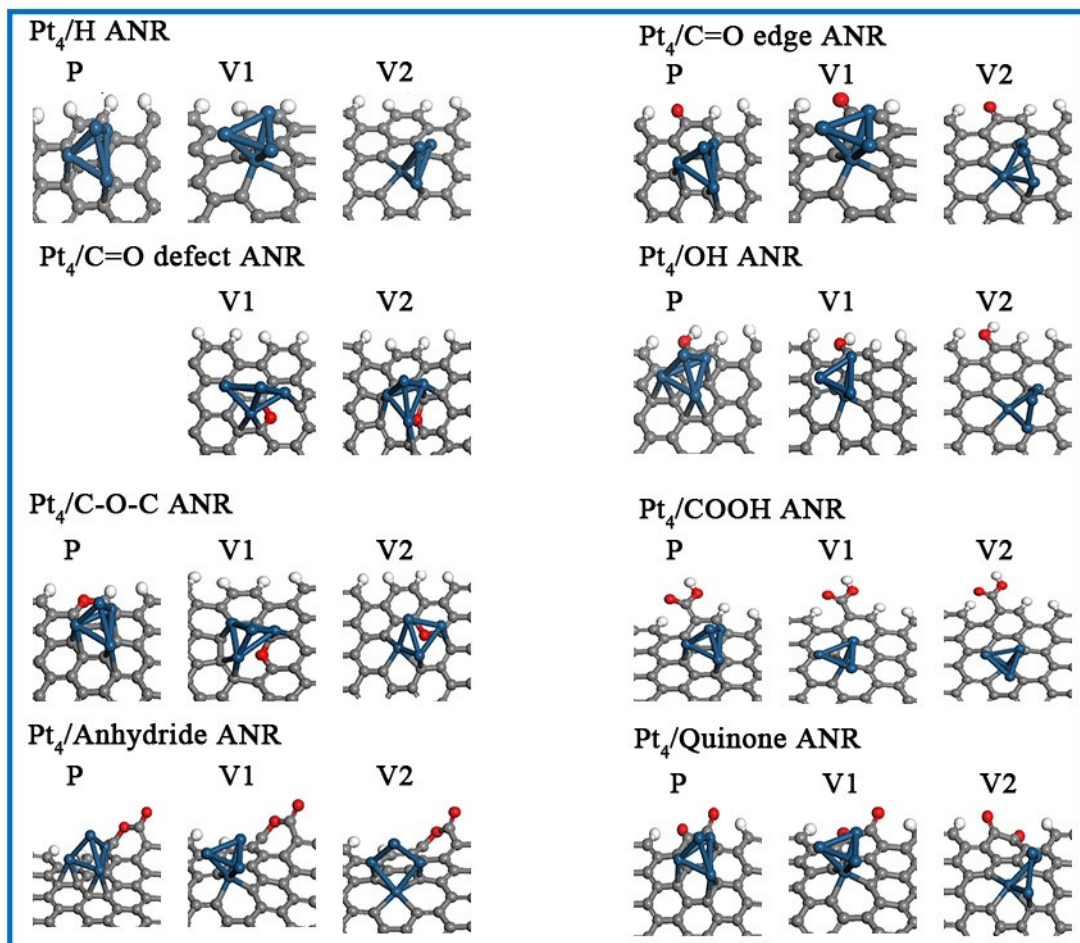

**Fig. S5.** The optimized configurations of Pt<sub>4</sub> anchored on the carbon nanoribbons with armchair edges.



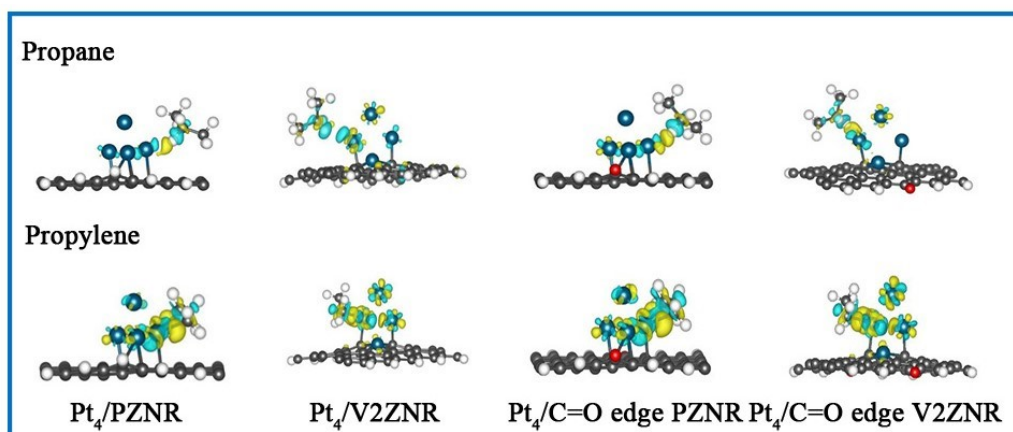

**Fig. S6.** Charge density differences of propane and propylene adsorbed on the catalysts, the charge accumulation and depletion were colored cyan and yellow, with the isosurface value being 0.003 a.u.

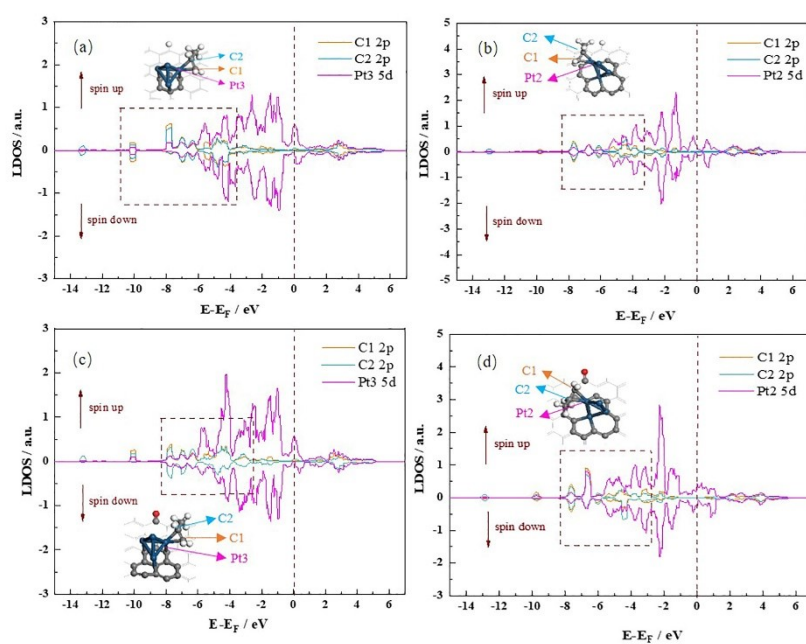

**Fig. S7.** The partial density of orbit states (PDOS) of the d-orbit in Pt atoms and p-orbit in C atoms of propylene adsorbed in (a) Pt<sub>4</sub>/PZNR, (b) Pt<sub>4</sub>/V2ZNR, (c) Pt<sub>4</sub>/C=O edge PZNR, (d) Pt<sub>4</sub>/C=O edge V2ZNR.

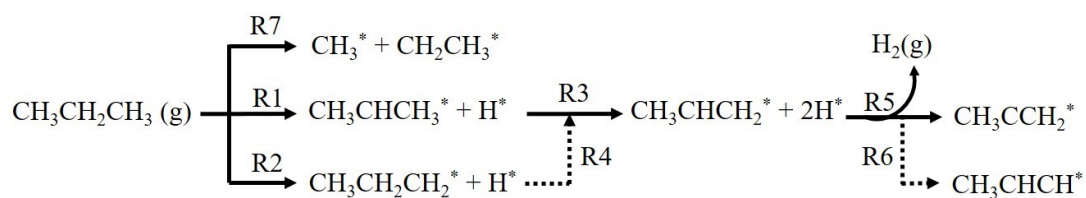

**Fig. S8.** The elementary reaction pathways involved in PDH.

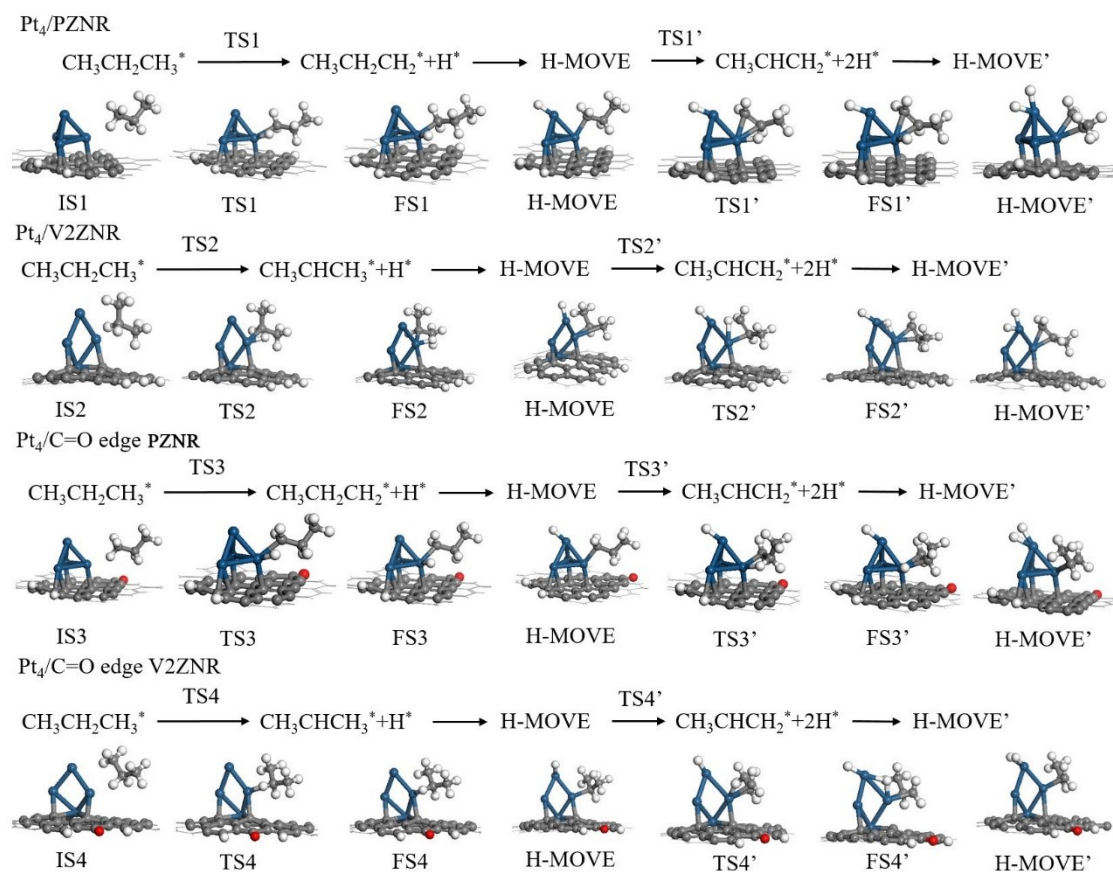

**Fig. S9.** The geometric configurations of the key reactive intermediates involved in the PDH.



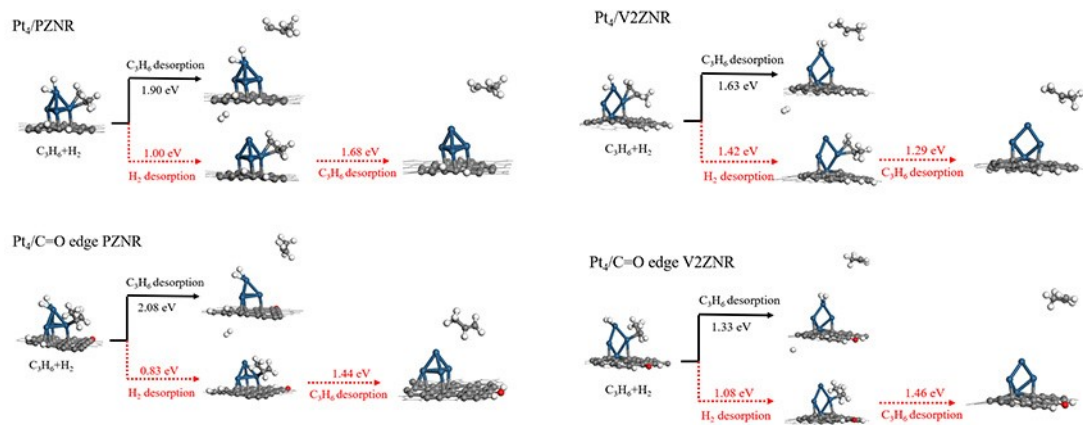

**Fig. S10.** The competition desorption of propylene and hydrogen during the regeneration of the active site.

**Table S1.** The activation barriers and reaction energies of C-H bond cleavage in CH<sub>4</sub> catalyzed by Pt<sub>4</sub> anchored on carbon nanoribbons.

| Catalyst                          | E <sub>a</sub> / eV | ΔE / eV | Catalyst                          | E <sub>a</sub> / eV | ΔE / eV |
|-----------------------------------|---------------------|---------|-----------------------------------|---------------------|---------|
| Pt <sub>4</sub> /PZNR             | 0.19                | -0.14   | Pt <sub>4</sub> /PANR             | 0.28                | -0.12   |
| Pt <sub>4</sub> /V1ZNR            | 0.18                | -0.43   | Pt <sub>4</sub> /V1ANR            | 0.20                | -0.53   |
| Pt <sub>4</sub> /V2ZNR            | 0.12                | -0.18   | Pt <sub>4</sub> /V2ANR            | 0.24                | -0.25   |
| Pt <sub>4</sub> /C=O edge PZNR    | 0.17                | -0.01   | Pt <sub>4</sub> /C=O edge PANR    | 0.13                | -0.43   |
| Pt <sub>4</sub> /C=O edge V1ZNR   | 0.17                | -0.44   | Pt <sub>4</sub> /C=O edge V1ANR   | 0.19                | -0.25   |
| Pt <sub>4</sub> /C=O edge V2ZNR   | 0.09                | -0.21   | Pt <sub>4</sub> /C=O edge V2ANR   | 0.23                | -0.09   |
| Pt <sub>4</sub> /C=O defect V1ZNR | 0.47                | -0.06   | Pt <sub>4</sub> /C=O defect V1ANR | 0.24                | 0.01    |
| Pt <sub>4</sub> /C=O defect V2ZNR | 0.43                | 0.06    | Pt <sub>4</sub> /C=O defect V2ANR | 0.34                | -0.02   |
| Pt <sub>4</sub> /OH PZNR          | 0.17                | -0.32   | Pt <sub>4</sub> /OH PANR          | 0.17                | -0.48   |
| Pt <sub>4</sub> /OH V1ZNR         | 0.17                | -0.34   | Pt <sub>4</sub> /OH V1ANR         | 0.18                | -0.54   |
| Pt <sub>4</sub> /OH V2ZNR         | 0.12                | -0.18   | Pt <sub>4</sub> /OH V2ANR         | 0.13                | -0.24   |
| Pt <sub>4</sub> /C-O-C PZNR       | 0.17                | -0.17   | Pt <sub>4</sub> /C-O-C PANR       | 0.14                | -0.42   |
| Pt <sub>4</sub> /C-O-C V1ZNR      | 0.23                | -0.10   | Pt <sub>4</sub> /C-O-C V1ANR      | 0.22                | -0.53   |
| Pt <sub>4</sub> /C-O-C V2ZNR      | 0.32                | -0.16   | Pt <sub>4</sub> /C-O-C V2ANR      | 0.26                | -0.25   |
| Pt <sub>4</sub> /COOH PZNR        | 0.15                | -0.12   | Pt <sub>4</sub> /COOH PANR        | 0.20                | -0.18   |
| Pt <sub>4</sub> /COOH V1ZNR       | 0.26                | -0.04   | Pt <sub>4</sub> /COOH V1ANR       | 0.22                | -0.56   |
| Pt <sub>4</sub> /COOH V2ZNR       | 0.18                | 0.00    | Pt <sub>4</sub> /COOH V2ANR       | 0.37                | -0.08   |
| Pt <sub>4</sub> /Anhydride PZNR   | 0.35                | -0.09   | Pt <sub>4</sub> /Anhydride PANR   | 0.10                | -0.49   |
| Pt <sub>4</sub> /Anhydride V1ZNR  | 0.22                | -0.40   | Pt <sub>4</sub> /Anhydride V1ANR  | 0.22                | -0.45   |
| Pt <sub>4</sub> /Anhydride V2ZNR  | 0.12                | -0.16   | Pt <sub>4</sub> /Anhydride V2ANR  | 0.21                | -0.17   |
| Pt <sub>4</sub> /Quinone PZNR     | 0.26                | -0.31   | Pt <sub>4</sub> /Quinone PANR     | 0.19                | -0.22   |
| Pt <sub>4</sub> /Quinone V1ZNR    | 0.17                | -0.48   | Pt <sub>4</sub> /Quinone V1ANR    | 0.18                | -0.39   |
| Pt <sub>4</sub> /Quinone V2ZNR    | 0.11                | -0.18   | Pt <sub>4</sub> /Quinone V2ANR    | 0.16                | -0.21   |

**Table S2.** The activation barriers and reaction energies of C-H bond cleavage from propane to propylene catalyzed by different active site in Pt<sub>4</sub>/C=O edge V2ZNR.

| Active site in Pt <sub>4</sub> /C=O edge<br>V2ZNR<br>Reactions                               | Pt <sub>4</sub> cluster |         | C=O edge groups     |         |
|----------------------------------------------------------------------------------------------|-------------------------|---------|---------------------|---------|
|                                                                                              | E <sub>a</sub> / eV     | ΔE / eV | E <sub>a</sub> / eV | ΔE / eV |
| CH <sub>3</sub> CH <sub>2</sub> CH <sub>3</sub> * → CH <sub>3</sub> CHCH <sub>3</sub> * + H* | 0.40                    | 0.02    | 1.02                | -0.16   |
| CH <sub>3</sub> CHCH <sub>3</sub> * + H* → CH <sub>3</sub> CH=CH <sub>2</sub> * + 2H*        | 0.37                    | -0.28   | 1.13                | 0.16    |
